# Supplementary material
Source: PubMed Central journal article supplement (PMC8600926)

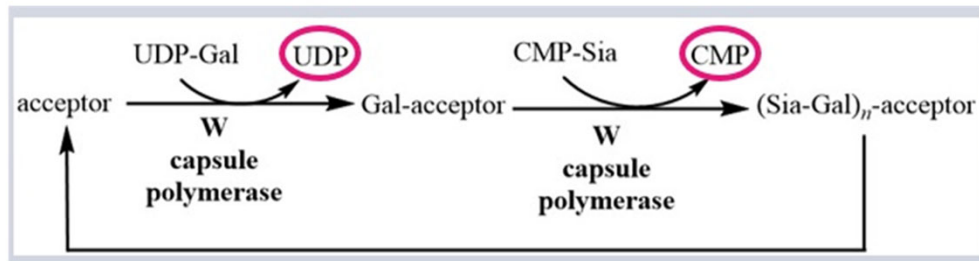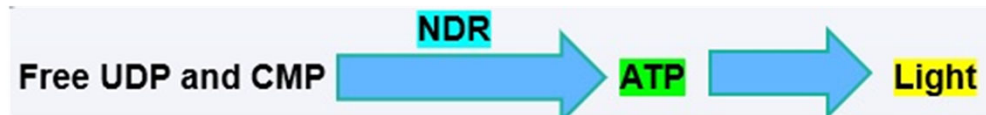

Supplement: 13104_2021_5831_MOESM1_ESM.pdf [file 13104_2021_5831_MOESM1_ESM.pdf]
